# Supplementary material
Source: publisher figshare collection journal article supplement (https://acs.figshare.com/ndownloader/files/3920257)
Supplement: Supplementary file 1 [file 3920257]

# Real-Time Observation of the Solid–Liquid– Vapor Dissolution of Individual Tin(IV) Oxide Nanowires

*Bethany M. Hudak,<sup>1</sup> Yao-Jen Chang,<sup>1</sup> Lei Yu,<sup>1</sup> Guohua Li,<sup>1</sup> Danielle N. Edwards,<sup>1</sup> and  
Beth S. Guiton<sup>1,2\*</sup>*

<sup>1</sup>Department of Chemistry, University of Kentucky, Lexington, Kentucky 40506, United  
States.

<sup>2</sup>Materials Science and Technology Division, Oak Ridge National Laboratory, Oak  
Ridge, Tennessee 37831, United States.

\*E-mail: beth.guiton@uky.edu

## NANOWIRE CHARACTERIZATION

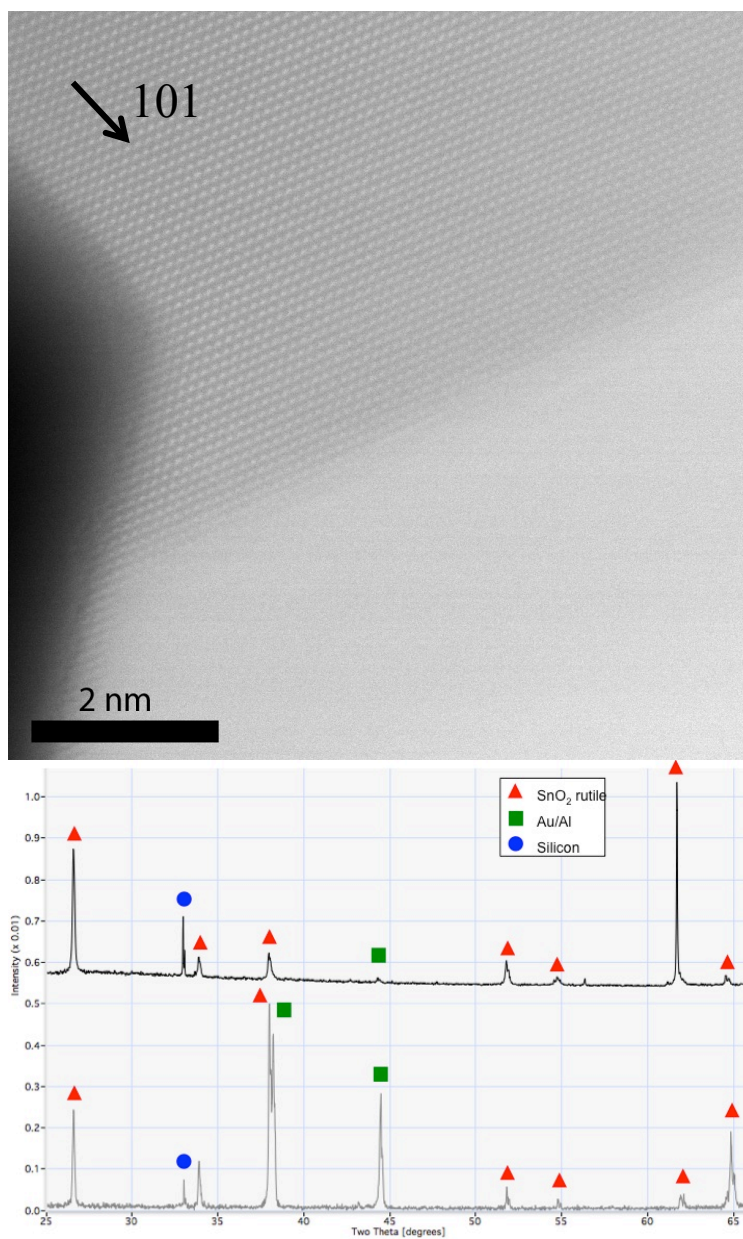

**Figure S1.** SnO<sub>2</sub> nanowire characterization. **(a)** High resolution Z-contrast STEM image of the droplet-nanowire interface. Arrow indicates the [101] growth direction. **(b)** XRD patterns from as-grown samples of SnO<sub>2</sub> (bottom) and In-doped SnO<sub>2</sub> (top) nanowires, indexed to rutile. Al and Si peaks are present due to the stage and substrate.

## IN SITU TEM HEATING

Nineteen wires were monitored while undergoing Au-catalyzed dissolution, using the same heating profile. The data from these wires is provided below in Chart S1. For each wire the temperature was stepped to 450°C then ramped to 750°C at 0.2°C per second and held at 750°C until the entire nanowire had been consumed.

| Wire | T <sub>melt</sub><br>(°C) | T <sub>move</sub><br>(°C) | D <sub>drop</sub><br>(nm) | D <sub>wire</sub><br>(nm) | D <sub>drop</sub> /D <sub>wire</sub> | D <sub>drop</sub> <sup>2</sup><br>(nm <sup>2</sup> ) | D <sub>drop</sub> <sup>3</sup><br>(nm <sup>3</sup> ) | dL/dt<br>(nm/sec) | Crystallinity | Residue on<br>Grid | Wire<br>Thinning | Head Status               | Obstruction on Surface |
|------|---------------------------|---------------------------|---------------------------|---------------------------|--------------------------------------|------------------------------------------------------|------------------------------------------------------|-------------------|---------------|--------------------|------------------|---------------------------|------------------------|
| 1    | 500                       | 516                       | 139.07                    | 70.59                     | 1.970                                | 19340.46                                             | 2689678.45                                           | 0.11              | single        | yes                | no               | disconnects               | yes                    |
| 2    | 540                       | 540                       | 91.07                     | 56.16                     | 1.622                                | 8293.74                                              | 755311.35                                            | 0.9               | single        | yes                | no               | stops                     | yes                    |
| 3    | 465                       | 473                       | 60.71                     | 37.45                     | 1.621                                | 3685.70                                              | 223759.10                                            | 0.12              | single        | yes                | no               | stops                     | no                     |
| 4    | 528                       | 539                       | 77.38                     | 50.14                     | 1.543                                | 5987.66                                              | 463325.47                                            | 2.51              | single        | yes                | no               | disconnects               | no                     |
| 5    | //////                    | //////                    | 101.27                    | 75.12                     | 1.348                                | 10255.61                                             | 1038585.92                                           | 4.31              | poly          | yes                | no               | stops                     | yes                    |
| 6    | 450                       | 450                       | 88.28                     | 57.42                     | 1.537                                | 7793.36                                              | 687997.68                                            | 2.8               | single        | yes                | no               | stops                     | no                     |
| 7    | 450                       | 450                       | 70.48                     | 51.02                     | 1.381                                | 4967.43                                              | 350104.49                                            | 8.03              | single        | yes                | no               | stops                     | no                     |
| 8    | 625                       | 625                       | 105.95                    | 74.24                     | 1.427                                | 11225.40                                             | 1189331.39                                           | 1.11              | single        | yes                | yes              | stops                     | yes                    |
| 9    | 516                       | 543                       | 105.4                     | 102.26                    | 1.031                                | 11109.16                                             | 1170905.46                                           | 0.46              | twinned       | yes                | no               | stops                     | yes                    |
| 10   | 563                       | 694                       | 99.56                     | 57.41                     | 1.734                                | 9912.19                                              | 986857.99                                            | 0.18              | single        | yes                | no               | stops                     | no                     |
| 11   | 450                       | 529.4                     | 58.65                     | 35.17                     | 1.668                                | 3439.82                                              | 201745.59                                            | 1.68              | single        | yes                | yes*             | detached from wire        | yes                    |
| 12   | 563.4                     | 578.8                     | 109.5                     | 76.84                     | 1.425                                | 11990.25                                             | 1312932.38                                           | 0.54              | single        | yes                | yes*             | detached from wire        | no                     |
| 13   | 526                       | 582.6                     | 84.18                     | 63.5                      | 1.326                                | 7086.27                                              | 596522.41                                            | 0.3               | single        | yes                | no               | detached from wire        | no                     |
| 14   | //////                    | //////                    | 77.54                     | 58.52                     | 1.325                                | 6012.45                                              | 466205.50                                            | //////            | single        | //////             | no               | no movement continues off | lots of residue        |
| 15   | 609.6                     | 630.6                     | 74.15                     | 44.01                     | 1.685                                | 5498.22                                              | 407693.20                                            | 0.46              | poly          | yes                | no               | screen                    | yes                    |
| 16   | 669.6                     | 678                       | 112.14                    | 57.6                      | 1.947                                | 12575.38                                             | 1410203.07                                           | 0.29              | single        | yes                | no               | stops                     | yes                    |
| 17   | 627                       | 696.8                     | 37.67                     | 35.24                     | 1.069                                | 1419.03                                              | 53454.82                                             | 1.24              | single        | yes                | yes              | stops                     | yes                    |
| 18   | 631                       | 682.6                     | 99.89                     | 58.21                     | 1.716                                | 9978.01                                              | 996703.63                                            | 0.48              | single        | yes                | no               | detached from wire        | no                     |
| 19   | 623.4                     | 668                       | 73.16                     | 52.48                     | 1.394                                | 5352.39                                              | 391580.53                                            | 0.1               | single        | yes                | yes              | detached from wire        | no                     |

**Chart S1.** Nineteen wires were recorded undergoing SLV using the same heating profile during *in situ* heating.

Selected plots of the data analysis are shown below. Figure S2 shows data from all 15 single-crystalline nanowires, Fig. S3 shows data from only those 10 nanowires whose diameters did not change noticeably during dissolution, and Fig. S4 shows data from the remaining 5 wires whose diameters decreased during dissolution.

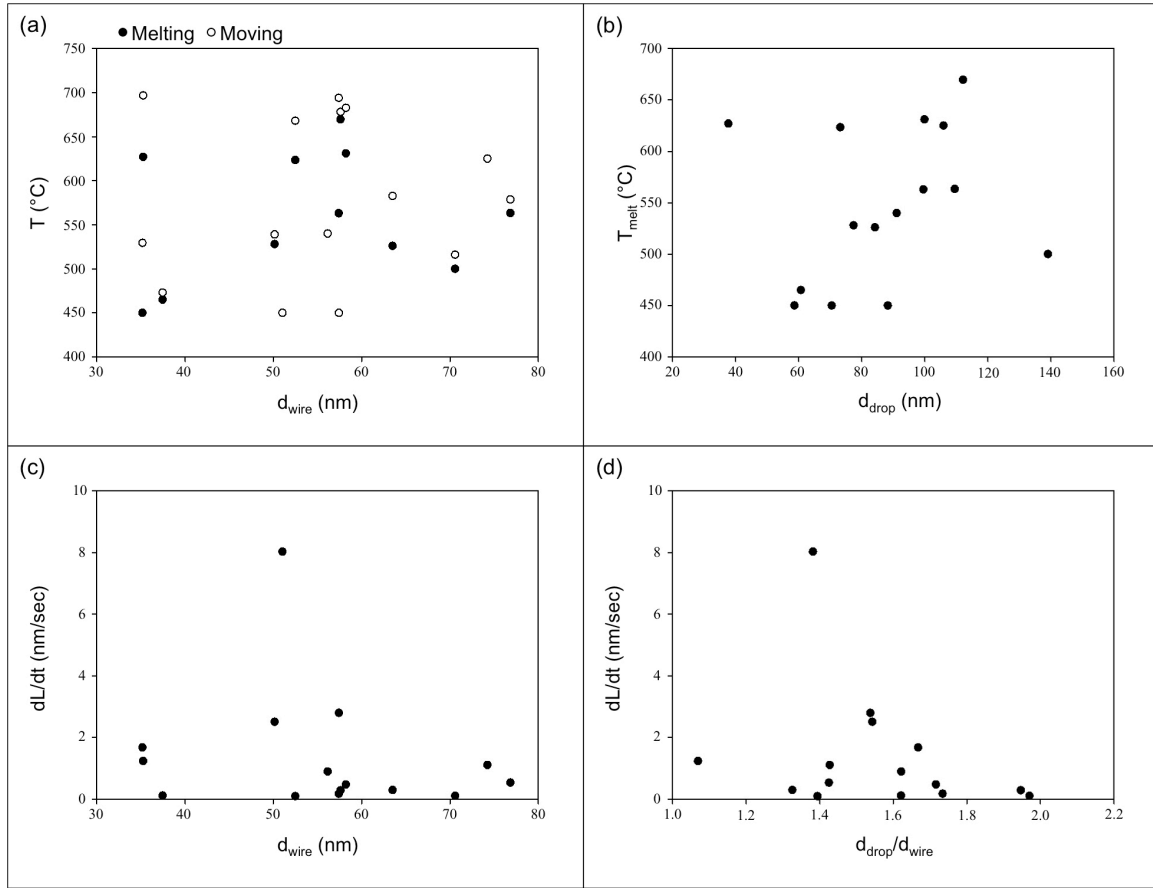

**Figure S2.** Kinetics of Au-catalyzed SnO<sub>2</sub> nanowire dissolution. Nanowires were heated from 450°C to 750°C at 0.2°C/sec, and then annealed at 750°C while dissolution rate was measured. All wires were single-crystalline. (a) Temperature at which droplet melts,  $T_{\text{melt}}$ , (dots) and is first observed to move,  $T_{\text{move}}$ , (open circles) as a function of the wire diameter. (b)  $T_{\text{melt}}$  as a function of droplet diameter. (c) Dissolution rate as a function of wire diameter. (d) Dissolution rate as a function of the ratio of droplet to wire diameter.

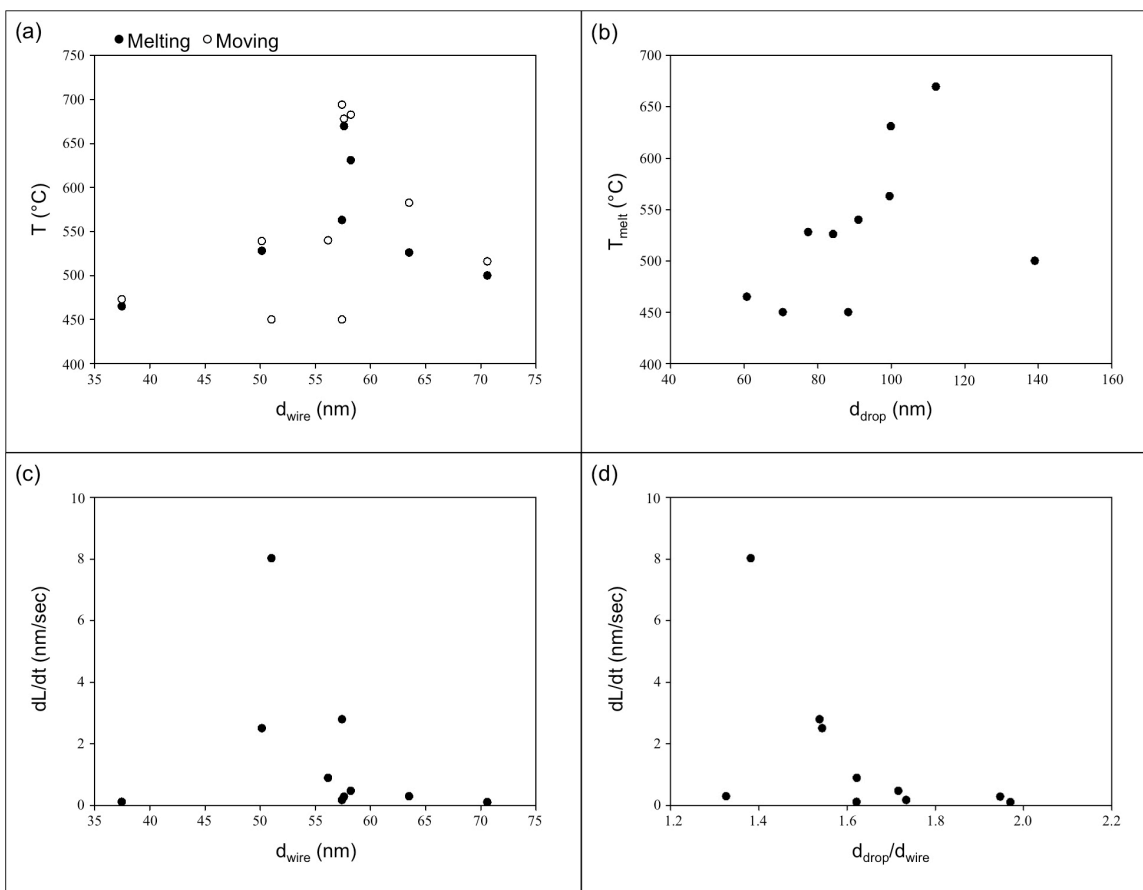

**Figure S3.** Kinetics of Au-catalyzed SnO<sub>2</sub> nanowire dissolution. Nanowires were heated from 450°C to 750°C at 0.2°C/sec, and then annealed at 750°C while dissolution rate was measured. All wires were single-crystalline **and underwent dissolution into the droplet with no observable change in wire diameter.** (a) Temperature at which droplet melts,  $T_{\text{melt}}$ , (dots) and is first observed to move,  $T_{\text{move}}$ , (open circles) as a function of the wire diameter. (b)  $T_{\text{melt}}$  as a function of droplet diameter. (c) Dissolution rate as a function of wire diameter. (d) Dissolution rate as a function of the ratio of droplet to wire diameter.

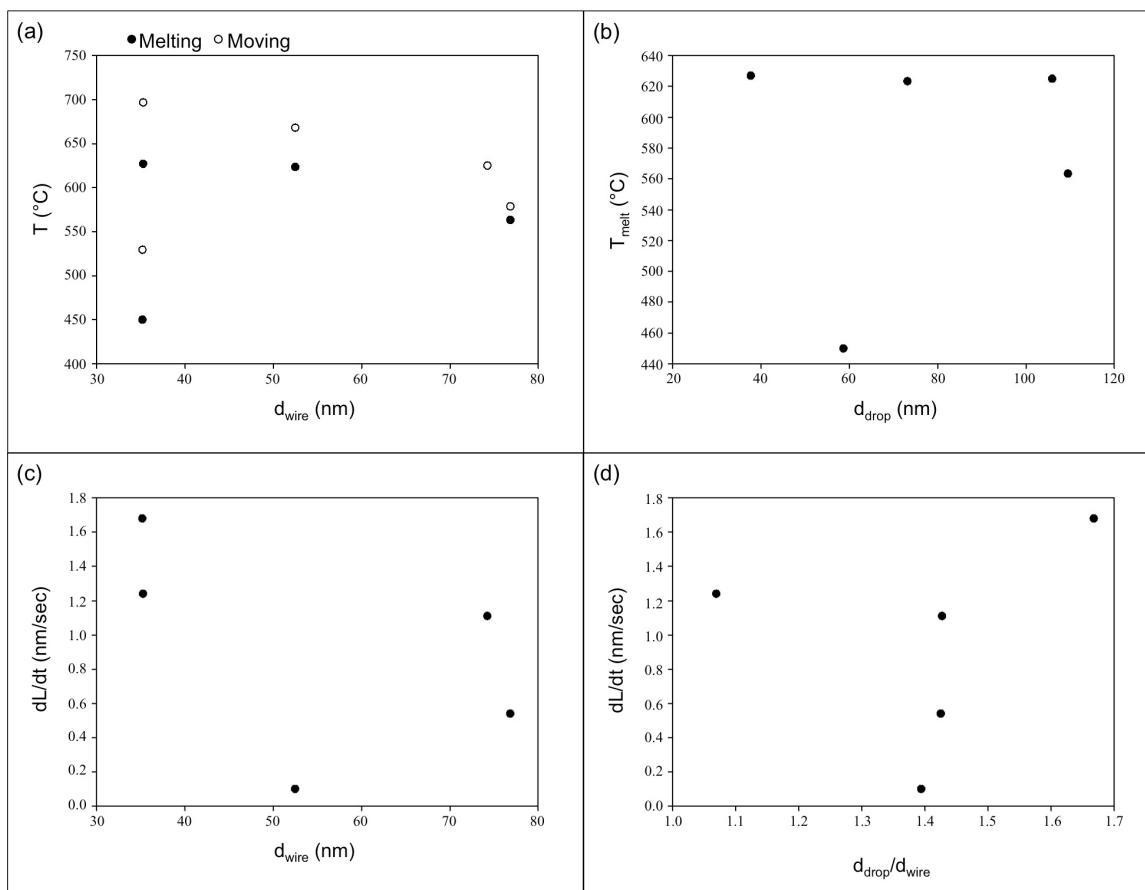

**Figure S4.** Kinetics of Au-catalyzed SnO<sub>2</sub> nanowire dissolution. Nanowires were heated from 450°C to 750°C at 0.2°C/sec, and then annealed at 750°C while dissolution rate was measured. All wires were single-crystalline **and underwent dissolution into the droplet with an observable decrease in wire diameter.** (a) Temperature at which droplet melts,  $T_{\text{melt}}$ , (dots) and is first observed to move,  $T_{\text{move}}$ , (open circles) as a function of the wire diameter. (b)  $T_{\text{melt}}$  as a function of droplet diameter. (c) Dissolution rate as a function of wire diameter. (d) Dissolution rate as a function of the ratio of droplet to wire diameter.

## MOVIES

Movies S1-S5 show the raw *in situ* heating data with temperatures overlaid. Movies S6-S7 do not have overlaid temperatures because a consistent heating profile was used; each wire was set to 450°C then ramped to 700°C at 2°C per second, held at 700°C, and quenched at 8:30 minute intervals to acquire EDS spectra. Each movie was edited using iMovie software to change the file length from its original length to 5:00 minutes in order to reduce file size for submission.

**Movie S1.** A pure SnO<sub>2</sub> nanowire dissolves into the gold catalyst particle at its head.  
Original movie length: 53:43

**Movie S2.** A pure SnO<sub>2</sub> nanowire dissolves into the gold catalyst particle at its head while the diameter simultaneously decreases. Original movie length: 45:57

**Movie S3.** An In-doped SnO<sub>2</sub> nanowire dissolves into the gold catalyst particle at its head.  
Original movie length: 39:58

**Movie S4.** An In-doped SnO<sub>2</sub> nanowire dissolves into the two gold catalyst particles at either end of the wire. The two particles agglomerate at the end to form one gold nanoparticle. Original movie length: 21:52

**Movie S5.** An In-doped SnO<sub>2</sub> nanowire dissolves into the gold catalyst particle at its head. The catalyst particle is seen to start to change direction part way through. The movie ends before complete dissolution of the nanowire because the nanowire extended

onto the E-chip ceramic where the thick ceramic prevents reasonable image quality.

Original movie length: 50:18

**Movie S6.** Pure  $\text{SnO}_2$  nanowire dissolved by the Au catalyst droplet through SLV. The reaction was periodically quenched so that EDS spectra could be acquired during the dissolution process. Original movie length: 1:07:05

**Movie S7.** Pure  $\text{SnO}_2$  nanowire dissolved by the Au catalyst droplet through SLV. The reaction was quenched periodically so that EDS spectra could be acquired during the dissolution process. Original movie length: 48:32
